# Supplementary material for: Phosphate-Solubilizing Enterobacter ludwigii AFFR02 and Bacillus megaterium Mj1212 Rescues Alfalfa’s Growth under Post-Drought Stress
Source: MDPI journal article supplement (doi:10.3390/agriculture11060485), 2021-05-24
Supplement: s1 [file s1]

Archive with 1 entries (1 files):
- agriculture-1199911-supplementary.pdf
