# Supplementary material for: Phosphate-Solubilizing Enterobacter ludwigii AFFR02 and Bacillus megaterium Mj1212 Rescues Alfalfa’s Growth under Post-Drought Stress
Source: MDPI journal article supplement (doi:10.3390/agriculture11060485), 2021-05-24

**Figure S1:** Growth of bacterial isolates in LB media supplemented with different concentration of polyethylene glycol (PEG) stress (0%, 5%, 10% and 15%) for 4 days. The growth were examined by using spectrophotometer at 600 nm. Each date point is the mean of three replicate while bars shows standard error.

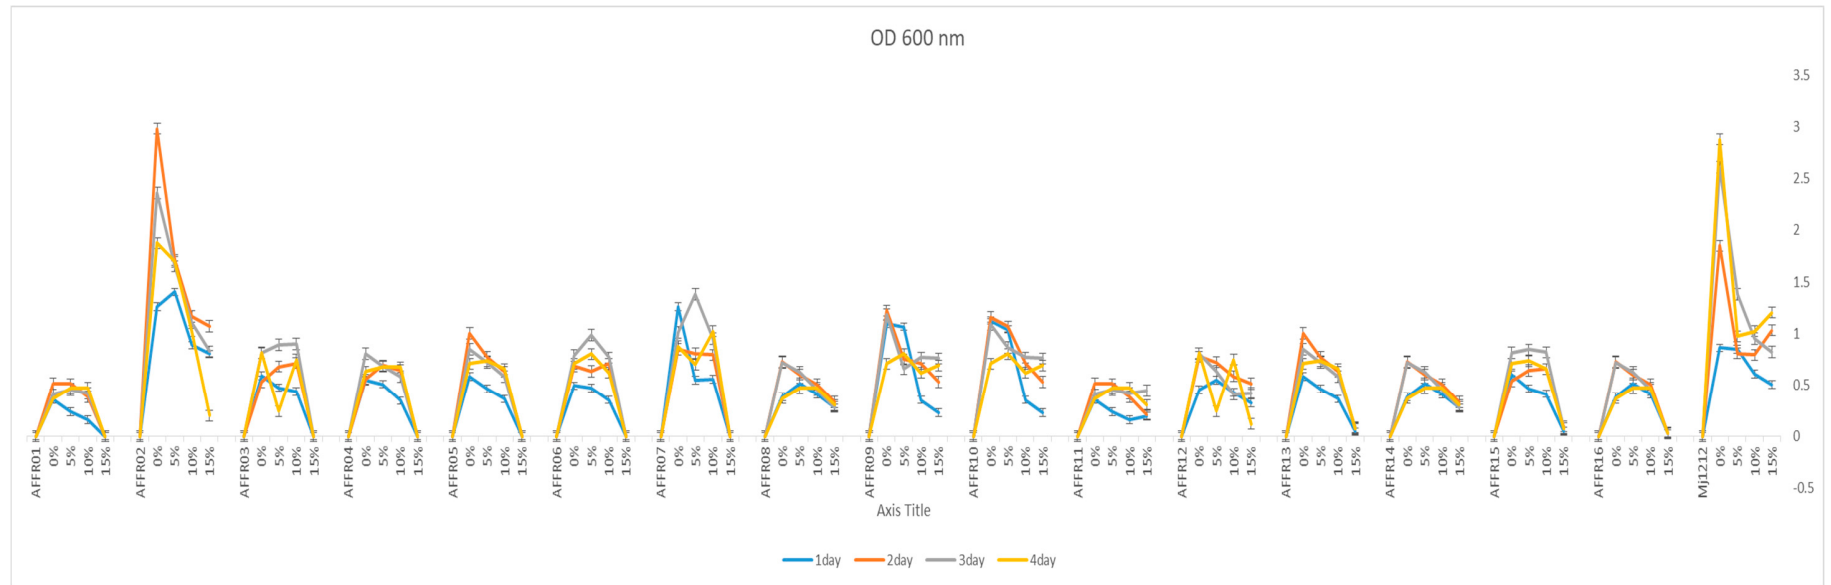

Supplement: s1 [file s1 › agriculture-1199911-supplementary.pdf]
